# 1 Predicting bacterial growth conditions from mRNA 2 and protein abundances

3 Mehmet U. Caglar<sup>1</sup>, Adam J. Hockenberry<sup>1</sup>, Claus O. Wilke<sup>1,\*</sup>

4  
5 <sup>1</sup>Department of Integrative Biology, The University of Texas at Austin, Austin, Texas,  
6 USA

7  
8 \*Corresponding author: [wilke@austin.utexas.edu](mailto:wilke@austin.utexas.edu)

## 9 10 **Abstract**

11 Cells respond to changing nutrient availability and external stresses by altering the  
12 expression of individual genes. Condition-specific gene expression patterns may  
13 provide a promising and low-cost route to quantifying the presence of various small  
14 molecules, toxins, or species-interactions in natural environments. However, whether  
15 gene expression signatures alone can predict individual environmental growth  
16 conditions remains an open question. Here, we used machine learning to predict  
17 closely-related growth conditions using 155 datasets of *E. coli* transcript and protein  
18 abundances. We show that models are able to discriminate between different  
19 environmental features with a relatively high degree of accuracy. We observed a small  
20 but significant increase in model accuracy by combining transcriptome and proteome-  
21 level data, and we show that stationary phase conditions are typically more difficult to  
22 distinguish from one another than conditions under exponential growth. Nevertheless,  
23 with sufficient training data, gene expression measurements from a single species are  
24 capable of distinguishing between environmental conditions that are separated by a  
25 single environmental variable.

## 26 Introduction

27 Environmental conditions across the planet vary in terms of their capacity to support  
28 microbial life. Further, individual environments can change rapidly over time, and these  
29 changes are likely to impact the composition of microbial communities and ecosystem  
30 functions in unpredictable ways [1,2]. Microbial species composition is partially  
31 indicative of environmental conditions, particularly with regard to the presence of  
32 individual specialist species that are well adapted to unique environments [3,4].  
33 However, many bacterial species within a community are generalists that are capable of  
34 thriving in diverse environments and must therefore sense and respond to various  
35 environmental signals [5]. For instance, *Escherichia coli* grows inside the comparatively  
36 warm, nutrient rich digestive tract of host [6] organisms but spends another portion of its  
37 life-cycle exposed to harsh environmental conditions upon being excreted and before  
38 finding another host. The mere presence of generalist species in an environment may  
39 provide little value for understanding past or current environmental conditions because  
40 their varied gene expression repertoire permits growth across varied conditions [7].

41  
42 On top of their native responses to external conditions, microbial cells can be  
43 engineered to act as sensors for a variety of environmental features via rational design  
44 of synthetic genetic circuits that may, for instance, cause the cells to fluoresce upon  
45 sensing of a particular small molecule [8]. Such applications can provide a useful, low-  
46 cost diagnostic for monitoring environmental changes, but individual synthetic biology  
47 applications take time and resources to develop. Additionally, there is still a concern  
48 about releasing genetically engineered species into natural environments where they  
49 may act as low-cost sensors for pollutants or various environmental phenomena of  
50 interest [9].

51  
52 To partially alleviate this concern, previous work has shown that the species  
53 composition of an environment can serve as a rapid and low-cost biosensor to indicate  
54 the presence of various contaminants according to the species abundances identified

55 via meta-genomic sequencing [3,10,11]. However, looking at the species composition  
56 alone fails to account for the fact that gene expression patterns of individual species—  
57 particularly for generalists—may provide even higher resolution into the past and  
58 current chemical composition of environments. The extent to which gene expression  
59 patterns of individual generalist species can be used to discriminate between  
60 environmental conditions remains unknown.

61

62 Combining different ‘omics’-scale technologies is likely to provide better discriminatory  
63 capability versus only monitoring mRNA abundances, for instance, but integrating  
64 datasets is challenging due to the biases of individual methods [12] and the inevitability  
65 of batch-level effects that occur when datasets are generated across multiple labs and  
66 platforms [13,14] . These problems are further exacerbated when considering the  
67 ultimate goal of detecting different environmental conditions *in situ*.

68

69 Prior studies have looked into the question of predicting external conditions by using the  
70 cells’ internal variables [15,16]. Other studies have interrogated multi-omic datasets  
71 from different growth conditions to understand the function of regulatory networks,  
72 individual gene functions, and resource allocation strategies [7,17]. However, the main  
73 focus of many of these studies has been to understand differences in gene expression  
74 patterns across environmental conditions so as to provide insight into *internal* cellular  
75 mechanisms and pathways or to predict cellular level phenotypes such as specific  
76 growth rates. By contrast, few studies have focused on using the internal state of cells  
77 to predict external environmental conditions across a range of partially-overlapping  
78 conditions and cellular growth rates.

79

80 Here, we are interested in determining whether gene expression patterns can  
81 discriminate between environmental conditions in the absence of prior knowledge about  
82 the role and function of individual genes. Our study leverages a large dataset of  
83 transcriptomic and proteomic measurements of *E.coli* growth under multiple distinct but  
84 closely-related conditions [18]. We use mRNA and protein composition data to train

85 machine learning models and find that highly similar environmental conditions can be  
86 discriminated with a relatively high degree of accuracy. We also investigate which  
87 conditions are more- and less-challenging to discriminate and find that prediction  
88 accuracies decrease substantially for stationary phase cells, indicating the importance  
89 of cellular growth for discriminating between conditions. Finally, we note that our  
90 accuracy remains limited by training set size such that our findings present a lower  
91 bound on the predictive power that is achievable given a greater availability of training  
92 data.

93

## 94 **Results**

### 95 **Data structure and pipeline design**

96 We used a previously generated dataset of whole-genome *E. coli* mRNA and protein  
97 abundances, measured under 34 different conditions [18,19]. This dataset consists of a  
98 total of 155 samples, for which mRNA abundances are available for 152 and protein  
99 abundances for 105 (Fig 1). For 102 samples, both mRNA and protein abundances are  
100 available. The 34 different experimental conditions were generated by systematically  
101 varying four parameters. Here we further simplified the experimental conditions into a  
102 total of 16, by grouping similar conditions together (e.g., 100, 200, and 300mm Na<sup>+</sup>  
103 were all labelled as “high Na”). For the remainder of this manuscript (unless otherwise  
104 noted) we use the term “growth condition” to refer to the four-dimensional vector of  
105 categorical variables defining growth phase (exponential, stationary, late stationary),  
106 carbon source (glucose, glycerol, gluconate, lactate), Mg<sup>2+</sup> concentration (low, base,  
107 high), and Na<sup>+</sup> concentration (base, high). The question we set out to answer is: to what  
108 extent are machine learning models capable of discriminating between these growth  
109 parameters given only knowledge of gene expression levels, provided as mRNA  
110 abundances, protein abundances, or both?

111

112 We applied a general cross-validation strategy and first split samples into training and  
113 test datasets. We next used the training data to fit supervised models to the gene

114 expression data to maximize correct predictions of the labeled environmental  
115 conditions. At the training stage, we employed parameter tuning, which required a  
116 further subdivision of the training data to identify the optimal tuning parameters. Finally,  
117 we use the trained and tuned models to predict test set data and report prediction  
118 accuracy. To assess robustness of our results to the choice of training and test data, we  
119 repeated this procedure 60 times. Our pipeline is illustrated in Fig 2 and described in  
120 detail in the Materials and Methods.

121

## 122 **Growth conditions can be predicted accurately from both** 123 **mRNA and protein abundances**

124 After constructing our analysis pipeline, we first asked whether there were major  
125 differences in the performance of different machine learning approaches. We tested four  
126 different machine learning models, three based on Support Vector Machines (SVMs)  
127 with different kernels (radial, sigmoidal, and linear) and the fourth using random forest  
128 classification. We trained models to predict [7,20] the entire four-dimensional condition  
129 vector at once for a given sample, and we used the multi-class macro  $F_1$  score [21] to  
130 quantify prediction accuracy. The  $F_1$  score is the harmonic mean of precision and recall.  
131 It approaches zero if either quantity approaches zero, and it approaches one if both  
132 quantities approach one (representing perfect prediction accuracy). We note that this  
133 score is highly conservative as it will classify a prediction as incorrect if a single variable  
134 is incorrectly predicted, even if the predictions for the remaining three variables of  
135 interest are correct. We assessed model performance during the tuning stage of our  
136 pipeline by recording which model had the best  $F_1$  score for each tuning run (S1 and S2  
137 Figs). At the tuning stage, we found that the SVM model with a radial kernel clearly  
138 outcompeted the other models when fit to mRNA data, and the random forest model  
139 outcompeted the other models when fit to protein data (Table 1).

140

141 We next compared the  $F_1$  scores for model predictions applied to the test set. When  
142 using mRNA abundance data alone, the distribution of  $F_1$  scores from our 60

143 independent replications were centered around a value of 0.7 (Fig 3). The  $F_1$  score  
144 distributions were virtually identical for the three SVM models and were somewhat lower  
145 for the random forest model. Model performance on test data using only protein  
146 abundance measurements was slightly worse than those achieved with mRNA  
147 abundance data. However, it is important to note that the protein abundance data  
148 contains fewer conditions overall, which may partially explain the decreased predictive  
149 accuracy of the protein-only model—a point to which we return to later.

150

151 In addition to assessing the overall predictive power using  $F_1$  scores, we also recorded  
152 the percentage of times specific growth conditions were accurately or erroneously  
153 predicted, and we report these results in the form of a confusion matrix (Fig 4). Here,  
154 the column headings at the top show the predicted condition from the model on the test  
155 set and the rows show the true experimental condition. The numbers and shading in the  
156 interior of the matrix represent the percentage of cases that a given experimental  
157 condition was predicted to be a certain growth condition. The numbers within each row  
158 add up to 100. The large numbers/dark colorings along the diagonal highlight the high  
159 percentage of true positive predictions whereas any off-diagonal elements represent  
160 incorrect predictions. We found that the erroneous off-diagonal predictions are partially  
161 driven by the uneven sampling of different conditions in the original dataset. Even  
162 though we used sample-number-adjusted class weights in all fitted models, we  
163 observed a trend of increasing fractions of correct predictions with increasing number of  
164 samples available under training (S3 Fig).

165

166 As we previously noted, the  $F_1$  score quantifies accuracy by only considering perfect  
167 predictions (i.e. when all 4 features are correctly predicted). A sample that is incorrectly  
168 classified for all four factors is thus treated the same as one that only differs from the  
169 true set of features by a single incorrect factor. In practice, we observed that the  
170 majority of incorrect predictions differed from their true condition vector by only a single  
171 value (S4 Fig).

172

## 173 **Joint consideration of mRNA and protein abundances**

### 174 **improves model accuracy**

175 We next asked whether predictions could be improved by simultaneously considering  
176 mRNA and protein abundances. To address this question, we limited our analysis to the  
177 subset of 102 samples for which both mRNA and protein abundances were available,  
178 and ran our analysis pipeline for mRNA abundances only, protein abundances only, and  
179 for the combined dataset containing both mRNA and protein abundances. For all four  
180 machine-learning algorithms, protein abundances yielded significantly better predictions  
181 than mRNA abundances (Fig 5, Table 2). This is in contrast to Fig 3, where we saw  
182 increased accuracy using mRNA abundance data. However, as previously noted, our  
183 dataset contains a larger number mRNA abundance samples, which results in a larger  
184 amount of training data. When compared on the same exact conditions—as depicted in  
185 Fig 5—protein abundance data appears to be more valuable for discriminating between  
186 different growth conditions. Notably, the combined dataset consisting of both mRNA and  
187 protein abundance measurements yielded the best overall predictive accuracy,  
188 irrespective of machine-learning algorithm used (Fig 5, Table 2).

189  
190 When considering the confusion matrices for the three scenarios (mRNA abundance,  
191 protein abundance, and combined), we found that many of the erroneous predictions  
192 arising from mRNA abundances alone were not that common when using protein  
193 abundances and vice versa (S5 and S6 Figs). For example, when using mRNA  
194 abundances, many conditions were erroneously predicted as being exponential phase,  
195 glycerol, base  $Mg^{2+}$ , base  $Na^+$ , or as stationary phase, glucose, base  $Mg^{2+}$ , high  $Na^+$ ;  
196 these particular predictions were rare or absent when using protein abundances. By  
197 contrast, when using protein abundances, several conditions were erroneously  
198 predicted as being stationary phase, glycerol, base  $Mg^{2+}$ , base  $Na^+$ , and these  
199 predictions were virtually absent when using mRNA abundance data. For predictions  
200 made from the combined dataset, erroneous predictions unique to either mRNA or  
201 protein abundances were generally suppressed, and only those predictions that arose

202 for both mRNA and protein abundances individually remained present in the combined  
203 dataset (S7 Fig).

204

## 205 **Prediction accuracy differs between environmental features**

206 We also assessed the sources of inaccuracy in our models. As previously noted, the  
207 majority of incorrect predictions differed by only a single factor. The environmental  
208 features that accounted for most of these single incorrect predictions were  $Mg^{2+}$   
209 concentration for the protein-only data and carbon sources for mRNA-only data.  
210 Moreover, growth phase (e.g. exponential, stationary, late-stationary) is not strictly an  
211 environmental variable and using this as a feature may partially skew our results if the  
212 goal is to predict *strictly external* conditions.

213

214 We thus trained and tested separate models using only exponential or only stationary  
215 phase datasets and asked to what extent these models could predict the remaining 3  
216 environmental features (carbon source,  $[Mg^{2+}]$ , and  $[Na^+]$ ). We found that prediction  
217 accuracy was consistently better for models trained on exponential-phase samples  
218 compared to models trained on stationary-phase samples, irrespective of the machine-  
219 learning algorithm used or the data source (mRNA, protein abundances, or both) (Fig  
220 6). This observation implies that *E. coli* gene expression patterns during stationary  
221 phase are less indicative of the external environment compared to cells experiencing  
222 exponential growth. A notable caveat is that we have fewer stationary phase samples  
223 and this decrease in accuracy may partially be due to the size of the training dataset.  
224 Even despite the lower accuracies, however, predictive accuracy from models trained  
225 solely on stationary phase cells was still much higher than random expectation,  
226 illustrating that quiescent cells retain a unique signature of the external environment for  
227 the conditions studied.

228

229 To better understand which conditions were the most problematic to predict, we  
230 constructed models to predict only *individual* features rather than the entire set of 4



231 features. When making predictions based on mRNA abundances only, models were  
232 most accurate in predicting growth phase and least accurate for carbon source, with  
233  $Mg^{2+}$  and  $Na^+$  concentration falling between these two extremes. By contrast, when  
234 making predictions based on protein abundances, the most predictable feature was  
235 carbon source, the least predictable was  $Mg^{2+}$  concentration, and  $Na^+$  concentration  
236 and growth phase fell in-between these two extremes (Fig 7, S8 Fig). Finally, for the  
237 combined mRNA and protein abundance dataset, we found that accuracy for carbon  
238 source and  $Mg^{2+}$  concentration generally fell between the accuracies observed using  
239 mRNA and protein abundances individually. By contrast, accuracies for the  $Na^+$   
240 concentration and growth phase were generally as good as—or better than—the  
241 prediction accuracies of the individual datasets (S9 Fig). Together, these findings  
242 highlight that mRNA and protein abundances differ in their ability to discriminate  
243 between particular environmental conditions.

244

## 245 **Model validation on external data**

246 The samples that we studied throughout this manuscript are fairly heterogeneous and  
247 were collected by different individuals over a span of several months/years. However,  
248 different sample types were still analyzed within the same labs, by the same protocols,  
249 and thus may be more consistent than one might expect from data collected and  
250 analyzed independently by different labs—which would be an ultimate goal of future  
251 applications of this methodology. We thus applied our best-fitting protein abundance  
252 model to analyze protein data with *similar* conditions that was independently collected  
253 and analyzed [7]. Since this external dataset did not contain measurements for all of the  
254 4196 proteins that we measured and constructed our model on, we tested two  
255 alternative approaches of applying our model to the external data. For the first  
256 approach, we filled the missing parts of the external data with the median values of our  
257 in-house data before making predictions. In the second approach, we restricted our  
258 training dataset to only include proteins that appeared in the external validation data set.  
259 These two approaches lead to comparable results (Fig 8). Notably, our model made

260 mostly correct predictions on this dataset. The model was most accurate at  
261 distinguishing between different growth phase data, and moderately accurate at  
262 distinguishing Na<sup>+</sup> concentration and carbon source. The external data did not have  
263 variation in Mg<sup>2+</sup> levels, however, and our model incorrectly predicted several samples  
264 to have high Mg<sup>2+</sup>.

265

## 266 **Discussion**

267 Our central goal in this manuscript was to determine whether gene expression  
268 measurements from a single species of bacterium are sufficient to predict environmental  
269 growth conditions. We analyzed a rich dataset of 152 samples for mRNA data and 105  
270 samples for protein data across 16 distinct laboratory conditions as a proof-of-concept.  
271 We could show that *E. coli* gene expression is responsive to external conditions in a  
272 measurable and consistent way that permits identification of external conditions from  
273 gene signatures alone using supervised machine learning techniques. While *E. coli* is a  
274 well-characterized species, our analysis relies on none of this *a priori* knowledge. It is  
275 thus likely that increasing the number and diversity of training samples and conditions  
276 will produce further improvements in accuracy and discrimination between a wider array  
277 of conditions.

278

279 Interestingly, we found that consideration of mRNA and protein datasets alone are  
280 sufficient to produce accurate results, but that joint consideration of both datasets  
281 results in superior predictive accuracy. This finding implies that post-transcriptional  
282 regulation is at least partially controlled by external conditions, which has been  
283 observed by previous studies that have investigated multi-omics datasets [12,20,22,23].  
284 Such regulation may result from post-translational modifications [24], stress coping  
285 mechanisms [25], differential translation of mRNAs, or protein-specific degradation  
286 patterns.

287

288 An important finding that we discovered was that cellular growth phase places limits on  
289 the predictability of external conditions, with stationary phase cells being particularly  
290 difficult to distinguish from one another irrespective of their external conditions. A  
291 possible explanation for this behavior might be associated with endogenous  
292 metabolism, whereby stationary phase cells start to metabolize surrounding dead cells  
293 instead of the provided carbon source. This new carbon source, which is independent of  
294 the externally provided carbon source, may suppress the differences between the cells  
295 in different external carbon source environments [26,27]. Another reason for this  
296 behavior might be related to strong coupling between gene expression noise and  
297 growth rate. Multiple studies have concluded that lower growth rates are associated with  
298 higher gene expression noise, which might be a survival strategy in harsh environments  
299 [28]. Negative correlations between population average gene expression and noise  
300 have been shown for *E. coli* and *Saccharomyces cerevisiae*, lending support for this  
301 theory [29,30]. Finally, we note that stationary phase cells have likely depleted the  
302 externally supplied carbon sources after several weeks of growth. The similarity of  
303 stationary phase cells to other stationary phase cells may be a consequence of them  
304 inhabiting more similar chemical environments to one another compared to during  
305 exponential growth where nutrient concentrations are more varied across conditions.  
306 Nevertheless, discrimination of external environmental factors in stationary phase cells  
307 was still much better than random—indicating that these populations continue to retain  
308 information about the external environment despite their overall quiescence.

309  
310 A relevant finding to emerge from our study is that different features of the environment  
311 may be more or less easy to discriminate from one another and this discrimination may  
312 depend on which molecular species is being interrogated. Growth phase, for instance,  
313 can be reliably predicted from mRNA concentrations but similar predictions from protein  
314 concentrations were less accurate. A possible explanation for this observation is the fact  
315 that mRNAs and proteins have different life-cycles [19,31]. Given the comparably slow  
316 degradation rates of proteins, a large portion of the stationary phase proteome is likely  
317 to have been transcribed during exponential phase growth. As another example, carbon

318 sources can be reliably predicted from protein concentrations, but the accuracy of  
319 carbon source predictions from models trained on mRNA concentrations was more  
320 limited. Carbon assimilation is known to be regulated by post-translational regulation  
321 [32–34], which may be a possible reason for this finding (Fig 7, S9 Fig).

322  
323 Despite the fact that we investigated over 150 samples spanning 16 unique conditions,  
324 a limitation of our work and conclusions is nevertheless sample size (though our study  
325 is comparable to or larger than similar multi-conditional transcriptomic and/or proteomic  
326 studies [7,35–37]). The comparison between all of our data with the more limited set  
327 that includes only the intersection of samples for which we have both mRNA and protein  
328 abundance data (Fig 4 compared to S5 and S6 Figs) indicates that prediction accuracy  
329 decreases as the size of our training sets get smaller. This trend indicates that our  
330 training set sizes are still ultimately limiting model accuracy. A second possible issue  
331 with our study is associated with sample number bias [38–40]. We made corrections  
332 with weight factors [41,42] and displayed the multi-class macro  $F_1$  score [43] to account  
333 for the fact that some conditions contained more samples, but the predictability of  
334 *individual* conditions nevertheless increased with the number of training samples for that  
335 particular condition (S3 Fig). This finding again highlights that increasing training data  
336 will likely result in higher prediction accuracy.

337  
338 Our study is a proof-of-principle towards the goal of using gene expression patterns of  
339 natural species as a rapid and low-cost method for assessing environmental conditions.  
340 Other research has shown that the species repertoire, derived from meta-genomic  
341 sequencing, may be useful for determining the presence of particular contaminants [3].  
342 Our findings suggest that further incorporation of species-specific gene expression  
343 patterns can likely improve the accuracy of such methods. While genetically engineered  
344 strains may play a similar role as environmental biosensors, our study highlights that—  
345 with enough training data—the molecular composition of natural populations may  
346 provide sufficient information to accurately resolve past and present environmental  
347 conditions.

## 348 **Materials and Methods**

### 349 **Data preparation and overall analysis strategy**

350 We used a set of 155 *E. coli* samples previously described [18,19]. Throughout this  
351 study, we used different subsets of these samples in different parts of the analysis. For  
352 “mRNA only” and “protein only” analyses we used all 152 samples with mRNA  
353 abundances and all 105 samples with protein abundances, respectively. For  
354 performance comparison of machine learning models between mRNA and protein  
355 abundances we used the subset of 102 samples that have both mRNA and protein  
356 abundance data. After selecting appropriate subsets of the data for a given analysis, we  
357 added abundances from technical replicates, normalized abundances by size factors  
358 calculated via DeSeq2 [44], and applied a variance stabilizing transformation [45,46]  
359 (VST).

360  
361 For each separate analysis, we divided the data into two subsets, (i) the training & tune  
362 set and (ii) the test set, using an 80:20 split (Fig 2). This division was done semi-  
363 randomly, such that our algorithm preserved the ratios of different conditions between  
364 the training & tune and the test subsets. We retained the condition labels in the training  
365 & tune data (thus our learning was supervised) but we discarded the sample labels for  
366 the test set. We then applied frozen Surrogate Variable Analysis [47] (fSVA) to remove  
367 batch effects from the samples. This algorithm can correct for batch effects in both the  
368 training & tune and the test data, without knowing the labels of the test data. After fSVA,  
369 we used principal component analysis [48] (PCA) to define the principal axes of the  
370 training & tune set and then rotated the test data set with respect to these axes. We  
371 then picked the top 10 most significant axes in the training & tune dataset for learning  
372 and prediction. Finally, we trained and tuned our candidate machine learning algorithms  
373 with the dimension reduced training & tune dataset and then applied those trained and  
374 tuned algorithms on the dimension-reduced test dataset to make predictions. This entire  
375 procedure was repeated 60 times for each separate analysis (Fig 2).

376

377 We used four different machine learning algorithms: SVM models with (i) linear, (ii)  
378 radial, and (iii) sigmoidal kernels, and (iv) random forest models. We used the R  
379 package e1071 [49] for implementing SVM models and the R package randomForest  
380 [50] for implementing random forest models. SVMs with radial and sigmoidal kernels  
381 were set to use the c-classification [51] algorithm.

382

## 383 **Model scoring**

384 Our goal throughout this work was to predict multiple parameters (i.e., growth phase,  
385 carbon source,  $Mg^{2+}$  concentration, or  $Na^{+}$  concentration) of each growth condition at  
386 once. Therefore, we could not measure model performance via ROC or precision–recall  
387 curves, which assume a simple binary (true/false) prediction. Instead, we assessed  
388 prediction accuracy via  $F_1$  scores, which jointly assess precision and recall. In particular,  
389 for predictions of multiple conditions at once, we scored prediction accuracy via the  
390 multi-class macro  $F_1$  score [21,43,52] that normalizes individual  $F_1$  scores over  
391 individual conditions, i.e., it gives each condition equal weight instead of each sample.  
392 There are two different macro  $F_1$  score calculation that have been proposed in the  
393 literature. First, we can average individual  $F_1$  scores over all conditions  $i$  [43]:

$$394 \quad F_{1, \text{macro}} = \langle F_{1,i} \rangle$$

395 where  $\langle \dots \rangle$  indicates the average and the individual  $F_1$  scores are defined as:

$$396 \quad F_{1,i} = 2 * \text{Precision}_i * \text{Recall}_i / (\text{Precision}_i + \text{Recall}_i).$$

397 Alternatively, we can average precision and recall and then combine those averages  
398 into an  $F_1$  score [21]:

$$399 \quad F_{1, \text{macro}} = 2 \langle \text{Precision}_i \rangle \langle \text{Recall}_i \rangle / (\langle \text{Precision}_i \rangle + \langle \text{Recall}_i \rangle).$$

400 Between these two options, we implemented the first, because it is not clear that  
401 individually averaging precision and recall before combining them into  $F_1$  appropriately

402 balances prediction accuracies from different conditions with very different prediction  
403 accuracies.

404

## 405 **Model training and tuning**

406 For training, we first divided the training & tune data further into separate training and  
407 tuning datasets, using a 75:25 split (Fig 2). As before for the subdivision between  
408 training and test data, we did this again semi-randomly, trying to preserve the ratios of  
409 individual conditions. We repeated this procedure 10 times to generate 10 independent  
410 pairs of training and tuning datasets. Next, we generated a parameter grid for the tuning  
411 process. We optimized the "cost" parameter for all three SVM models and the "gamma"  
412 parameter for the SVM models with radial and sigmoidal kernels (S1 Fig). For the  
413 random forest algorithm, we optimized three parameters; "mtry", "ntrees", and  
414 "nodesize".

415

416 We trained each of the four machine learning models on all 10 training datasets and  
417 made predictions on the 10 tuning datasets. We applied a class weight normalization  
418 during training, where class weights are inversely proportional to the corresponding  
419 number of training samples and calculated independently for each training run. We  
420 calculated macro  $F_1$  scores for each model parameter setting for each tuning dataset  
421 and then averaged the scores over all tuning datasets to obtain an average  
422 performance score for each algorithm and for each parameter combination. The  
423 parameter combination with the highest average  $F_1$  score was considered the winning  
424 parameter combination and was subsequently used for prediction on the test dataset  
425 (Fig 2).

426

## 427 **Model validation on external data**

428 We validated our predictions against independently published external data [7]. This  
429 external dataset consisted of 22 conditions, of which we could match five to our

430 conditions. For all five samples,  $Mg^{2+}$  levels were held constant and approximately  
431 matched our base  $Mg^{2+}$  levels. The first sample used glucose as carbon source, did not  
432 experience any osmotic stress (no elevated sodium), and was collected in the  
433 exponential growth phase. The second sample used glycerol as carbon source, did not  
434 experience any osmotic stress (no elevated sodium), and was collected in the  
435 exponential growth phase. The third sample included 50mM sodium, glucose as carbon  
436 source, and was collected in the exponential growth phase. Because our high-sodium  
437 samples all included 100mM of sodium or more [18], this third sample fell in-between  
438 what we consider base sodium and high sodium. Samples four and five used glucose  
439 as carbon source, did not experience osmotic stress, and were measured after 24 and  
440 72 hours of growth, respectively. In our samples, we defined stationary phase as 24–48  
441 hours and late stationary phase as 1 to 2 weeks [18]. Thus, sample four matched our  
442 stationary phase samples and sample five fell in-between our stationary and late-  
443 stationary phase samples.

444

## 445 **Statistical analysis and data availability**

446 All statistical analyses were performed in R. All processed data and analysis scripts are  
447 available on GitHub: [https://github.com/umutcaglar/ecoli\\_multiple\\_growth\\_conditions](https://github.com/umutcaglar/ecoli_multiple_growth_conditions)  
448 (permanent archived version available via zenodo: 10.5281/zenodo.1294110). mRNA  
449 and protein abundances have been previously published [18,19]. Raw Illumina read  
450 data and processed files of read counts per gene are available from the NCBI GEO  
451 database [53] (accession numbers GSE67402 and GSE94117). Mass spectrometry  
452 proteomics data are available via PRIDE [54] (accession numbers PXD002140 and  
453 PXD005721).

454



## 455 **Acknowledgements**

456 The authors acknowledge support from the Texas Advanced Computing Center (TACC)  
457 at The University of Texas at Austin for providing high-performance computing  
458 resources.

## 459 **References**

- 460 1. Halpern BS, Walbridge S, Selkoe KA, Kappel CV, Micheli F, D'Agrosa C, et al. A  
461 global map of human impact on marine ecosystems. *Science*. 2008;319: 948–952.  
462 doi:10.1126/science.1149345
- 463 2. Sahney S, Benton MJ, Ferry PA. Links between global taxonomic diversity,  
464 ecological diversity and the expansion of vertebrates on land. *Biol Lett*. 2010;6:  
465 544–547. doi:10.1098/rsbl.2009.1024
- 466 3. He Z, Zhang P, Wu L, Rocha AM, Tu Q, Shi Z, et al. Microbial Functional Gene  
467 Diversity Predicts Groundwater Contamination and Ecosystem Functioning. *mBio*.  
468 2018;9: e02435-17. doi:10.1128/mBio.02435-17
- 469 4. Poisot T, Kéfi S, Morand S, Stanko M, Marquet PA, Hochberg ME. A continuum of  
470 specialists and generalists in empirical communities. *PloS One*. 2015;10:  
471 e0114674. doi:10.1371/journal.pone.0114674
- 472 5. Sriswasdi S, Yang C, Iwasaki W. Generalist species drive microbial dispersion and  
473 evolution. *Nat Commun*. 2017;8: 1162. doi:10.1038/s41467-017-01265-1
- 474 6. Mitchell A, Romano GH, Groisman B, Yona A, Dekel E, Kupiec M, et al. Adaptive  
475 prediction of environmental changes by microorganisms. *Nature*. 2009;460: 220–  
476 224. doi:10.1038/nature08112
- 477 7. Schmidt A, Kochanowski K, Vedelaar S, Ahrné E, Volkmer B, Callipo L, et al. The  
478 quantitative and condition-dependent *Escherichia coli* proteome. *Nat Biotechnol*.  
479 2016;34: 104–110. doi:10.1038/nbt.3418
- 480 8. Slomovic S, Pardee K, Collins JJ. Synthetic biology devices for in vitro and in vivo  
481 diagnostics. *Proc Natl Acad Sci*. 2015;112: 14429–14435.  
482 doi:10.1073/pnas.1508521112
- 483 9. Roggo C, van der Meer JR. Miniaturized and integrated whole cell living bacterial  
484 sensors in field applicable autonomous devices. *Curr Opin Biotechnol*. 2017;45:  
485 24–33. doi:10.1016/j.copbio.2016.11.023

- 486 10. Flynn TM, Sanford RA, Ryu H, Bethke CM, Levine AD, Ashbolt NJ, et al. Functional  
487 microbial diversity explains groundwater chemistry in a pristine aquifer. *BMC*  
488 *Microbiol.* 2013;13: 146. doi:10.1186/1471-2180-13-146
- 489 11. Hemme CL, Deng Y, Gentry TJ, Fields MW, Wu L, Barua S, et al. Metagenomic  
490 insights into evolution of a heavy metal-contaminated groundwater microbial  
491 community. *ISME J.* 2010;4: 660–672. doi:10.1038/ismej.2009.154
- 492 12. Kim M, Rai N, Zorraquino V, Tagkopoulos I. Multi-omics integration accurately  
493 predicts cellular state in unexplored conditions for *Escherichia coli*. *Nat Commun.*  
494 2016;7. doi:10.1038/ncomms13090
- 495 13. Leek JT, Scharpf RB, Bravo HC, Simcha D, Langmead B, Johnson WE, et al.  
496 Tackling the widespread and critical impact of batch effects in high-throughput  
497 data. *Nat Rev Genet.* 2010;11. doi:10.1038/nrg2825
- 498 14. Scharpf RB, Ruczinski I, Carvalho B, Doan B, Chakravarti A, Irizarry RA. A  
499 multilevel model to address batch effects in copy number estimation using SNP  
500 arrays. *Biostat Oxf Engl.* 2011;12: 33–50. doi:10.1093/biostatistics/kxq043
- 501 15. Brandes A, Lun DS, Ip K, Zucker J, Colijn C, Weiner B, et al. Inferring Carbon  
502 Sources from Gene Expression Profiles Using Metabolic Flux Models. *PLOS ONE.*  
503 2012;7: e36947. doi:10.1371/journal.pone.0036947
- 504 16. Sridhara V, Meyer AG, Rai P, Barrick JE, Ravikumar P, Segrè D, et al. Predicting  
505 Growth Conditions from Internal Metabolic Fluxes in an In-Silico Model of *E. coli*.  
506 *PLOS ONE.* 2014;9: e114608. doi:10.1371/journal.pone.0114608
- 507 17. Hui S, Silverman JM, Chen SS, Erickson DW, Basan M, Wang J, et al. Quantitative  
508 proteomic analysis reveals a simple strategy of global resource allocation in  
509 bacteria. *Mol Syst Biol.* 2015;11: 784. doi:10.15252/msb.20145697
- 510 18. Caglar MU, Houser JR, Barnhart CS, Boutz DR, Carroll SM, Dasgupta A, et al. The  
511 *E. coli* molecular phenotype under different growth conditions. *Sci Rep.* 2017;7:  
512 45303. doi:10.1038/srep45303
- 513 19. Houser JR, Barnhart C, Boutz DR, Carroll SM, Dasgupta A, Michener JK, et al.  
514 Controlled Measurement and Comparative Analysis of Cellular Components in *E.*  
515 *coli* Reveals Broad Regulatory Changes in Response to Glucose Starvation. *PLOS*  
516 *Comput Biol.* 2015;11: e1004400. doi:10.1371/journal.pcbi.1004400
- 517 20. Wilmes A, Limonciel A, Aschauer L, Moenks K, Bielow C, Leonard MO, et al.  
518 Application of integrated transcriptomic, proteomic and metabolomic profiling for  
519 the delineation of mechanisms of drug induced cell stress. *J Proteomics.* 2013;79:  
520 180–194. doi:10.1016/j.jprot.2012.11.022

- 521 21. Sokolova M, Lapalme G. A systematic analysis of performance measures for  
522 classification tasks. *Inf Process Manag.* 2009;45: 427–437.  
523 doi:10.1016/j.ipm.2009.03.002
- 524 22. Nie L, Wu G, Culley DE, Scholten JCM, Zhang W. Integrative Analysis of  
525 Transcriptomic and Proteomic Data: Challenges, Solutions and Applications. *Crit*  
526 *Rev Biotechnol.* 2007;27: 63–75. doi:10.1080/07388550701334212
- 527 23. Zhang W, Li F, Nie L. Integrating multiple “omics” analysis for microbial biology:  
528 application and methodologies. *Microbiol Read Engl.* 2010;156: 287–301.  
529 doi:10.1099/mic.0.034793-0
- 530 24. Oliveira AP, Sauer U. The importance of post-translational modifications in  
531 regulating *Saccharomyces cerevisiae* metabolism. *FEMS Yeast Res.* 2012;12:  
532 104–117. doi:10.1111/j.1567-1364.2011.00765.x
- 533 25. de Nadal E, Ammerer G, Posas F. Controlling gene expression in response to  
534 stress. *Nat Rev Genet.* 2011;12: 833–845. doi:10.1038/nrg3055
- 535 26. R Kolter, D A Siegele, Tormo and A. The Stationary Phase of The Bacterial Life  
536 Cycle. *Annu Rev Microbiol.* 1993;47: 855–874.  
537 doi:10.1146/annurev.mi.47.100193.004231
- 538 27. Maier RM, Pepper IL. Chapter 3 - Bacterial Growth. *Environmental Microbiology*  
539 (Third edition). San Diego: Academic Press; 2015. pp. 37–56. doi:10.1016/B978-0-  
540 12-394626-3.00003-X
- 541 28. Keren L, Dijk D van, Weingarten-Gabbay S, Davidi D, Jona G, Weinberger A, et al.  
542 Noise in gene expression is coupled to growth rate. *Genome Res.* 2015;  
543 gr.191635.115. doi:10.1101/gr.191635.115
- 544 29. Bar-Even A, Paulsson J, Maheshri N, Carmi M, O’Shea E, Pilpel Y, et al. Noise in  
545 protein expression scales with natural protein abundance. *Nat Genet.* 2006;38:  
546 636–643. doi:10.1038/ng1807
- 547 30. Taniguchi Y, Choi PJ, Li G-W, Chen H, Babu M, Hearn J, et al. Quantifying *E. coli*  
548 Proteome and Transcriptome with Single-Molecule Sensitivity in Single Cells.  
549 *Science.* 2010;329: 533–538. doi:10.1126/science.1188308
- 550 31. Milo R, Jorgensen P, Moran U, Weber G, Springer M. how fast do rnas and  
551 proteins degrade? *BioNumbers—the database of key numbers in molecular and*  
552 *cell biology.* 2010.
- 553 32. Martínez-Gómez K, Flores N, Castañeda HM, Martínez-Batallar G, Hernández-  
554 Chávez G, Ramírez OT, et al. New insights into *Escherichia coli* metabolism:  
555 carbon scavenging, acetate metabolism and carbon recycling responses during

- 556 growth on glycerol. *Microb Cell Factories*. 2012;11: 46. doi:10.1186/1475-2859-11-  
557 46
- 558 33. Perrenoud A, Sauer U. Impact of Global Transcriptional Regulation by ArcA, ArcB,  
559 Cra, Crp, Cya, Fnr, and Mlc on Glucose Catabolism in *Escherichia coli*. *J Bacteriol*.  
560 2005;187: 3171–3179. doi:10.1128/JB.187.9.3171-3179.2005
- 561 34. Kumar R, Shimizu K. Transcriptional regulation of main metabolic pathways of  
562 *cyoA*, *cydB*, *fnr*, and *fur* gene knockout *Escherichia coli* in C-limited and N-limited  
563 aerobic continuous cultures. *Microb Cell Factories*. 2011;10: 3. doi:10.1186/1475-  
564 2859-10-3
- 565 35. Soufi B, Krug K, Harst A, Macek B. Characterization of the *E. coli* proteome and its  
566 modifications during growth and ethanol stress. *Front Microbiol*. 2015;6: 103.  
567 doi:10.3389/fmicb.2015.00103
- 568 36. Lewis NE, Cho B-K, Knight EM, Palsson BO. Gene Expression Profiling and the  
569 Use of Genome-Scale In Silico Models of *Escherichia coli* for Analysis: Providing  
570 Context for Content. *J Bacteriol*. 2009;191: 3437–3444. doi:10.1128/JB.00034-09
- 571 37. Yoon SH, Han M-J, Jeong H, Lee CH, Xia X-X, Lee D-H, et al. Comparative multi-  
572 omics systems analysis of *Escherichia coli* strains B and K-12. *Genome Biol*.  
573 2012;13: R37. doi:10.1186/gb-2012-13-5-r37
- 574 38. Batista GEAPA, Prati RC, Monard MC. A Study of the Behavior of Several Methods  
575 for Balancing Machine Learning Training Data. *SIGKDD Explor Newsl*. 2004;6: 20–  
576 29. doi:10.1145/1007730.1007735
- 577 39. Chawla NV. Data Mining for Imbalanced Datasets: An Overview. In: Maimon O,  
578 Rokach L, editors. *Data Mining and Knowledge Discovery Handbook*. Springer US;  
579 2005. pp. 853–867. doi:10.1007/0-387-25465-X\_40
- 580 40. He H, Garcia EA. Learning from Imbalanced Data. *IEEE Trans Knowl Data Eng*.  
581 2009;21: 1263–1284. doi:10.1109/TKDE.2008.239
- 582 41. Huang Y-M, Du S-X. Weighted support vector machine for classification with  
583 uneven training class sizes. 2005 International Conference on Machine Learning  
584 and Cybernetics. 2005. pp. 4365-4369 Vol. 7. doi:10.1109/ICMLC.2005.1527706
- 585 42. Support Vector Machines [Internet]. [cited 24 Apr 2017]. Available:  
586 <http://www.di.fc.ul.pt/~jpn/r/svm/svm.html>
- 587 43. Yang Y. An Evaluation of Statistical Approaches to Text Categorization. *Inf Retr*.  
588 1999;1: 69–90. doi:10.1023/A:1009982220290

- 589 44. Love MI, Huber W, Anders S. Moderated estimation of fold change and dispersion  
590 for RNA-seq data with DESeq2. *Genome Biol.* 2014;15: 550. doi:10.1186/s13059-  
591 014-0550-8
- 592 45. Differential analysis of count data – the DESeq2 package [Internet]. 27 Jun 2016  
593 [cited 12 Apr 2016]. Available:  
594 [http://journals.plos.org/ploscompbiol/article/asset?id=10.1371%2Fjournal.pcbi.1004](http://journals.plos.org/ploscompbiol/article/asset?id=10.1371%2Fjournal.pcbi.1004127.PDF)  
595 [127.PDF](http://journals.plos.org/ploscompbiol/article/asset?id=10.1371%2Fjournal.pcbi.1004127.PDF)
- 596 46. Anders S, Huber W. Differential expression analysis for sequence count data.  
597 *Genome Biol.* 2010;11: R106. doi:10.1186/gb-2010-11-10-r106
- 598 47. Parker HS, Bravo HC, Leek JT. Removing batch effects for prediction problems  
599 with frozen surrogate variable analysis. *PeerJ.* 2014;2: e561. doi:10.7717/peerj.561
- 600 48. Jolliffe I. Principal Component Analysis. Wiley StatsRef: Statistics Reference  
601 Online. John Wiley & Sons, Ltd; 2014. doi:10.1002/9781118445112.stat06472
- 602 49. Meyer D, Wien TU. Support Vector Machines. The Interface to libsvm in package  
603 e1071. Online-Documentation of the package e1071 for "R". 2001.
- 604 50. Liaw A, Wiener M. Classification and Regression by randomForest. *R News.*  
605 2002;2: 18–22.
- 606 51. Chang C-C, Lin C-J. LIBSVM: A Library for Support Vector Machines. *ACM Trans*  
607 *Intell Syst Technol.* 2011;2: 27:1–27:27. doi:10.1145/1961189.1961199
- 608 52. Ghamrawi N, McCallum A. Collective Multi-label Classification. Proceedings of the  
609 14th ACM International Conference on Information and Knowledge Management.  
610 New York, NY, USA: ACM; 2005. pp. 195–200. doi:10.1145/1099554.1099591
- 611 53. Barrett T, Wilhite SE, Ledoux P, Evangelista C, Kim IF, Tomashevsky M, et al.  
612 NCBI GEO: archive for functional genomics data sets—update. *Nucleic Acids Res.*  
613 2013;41: D991–D995. doi:10.1093/nar/gks1193
- 614 54. Vizcaíno JA, Deutsch EW, Wang R, Csordas A, Reisinger F, Ríos D, et al.  
615 ProteomeXchange provides globally coordinated proteomics data submission and  
616 dissemination. In: *Nature Biotechnology* [Internet]. 10 Mar 2014 [cited 10 May  
617 2018]. doi:10.1038/nbt.2839

618

619

## 620 Figures

621

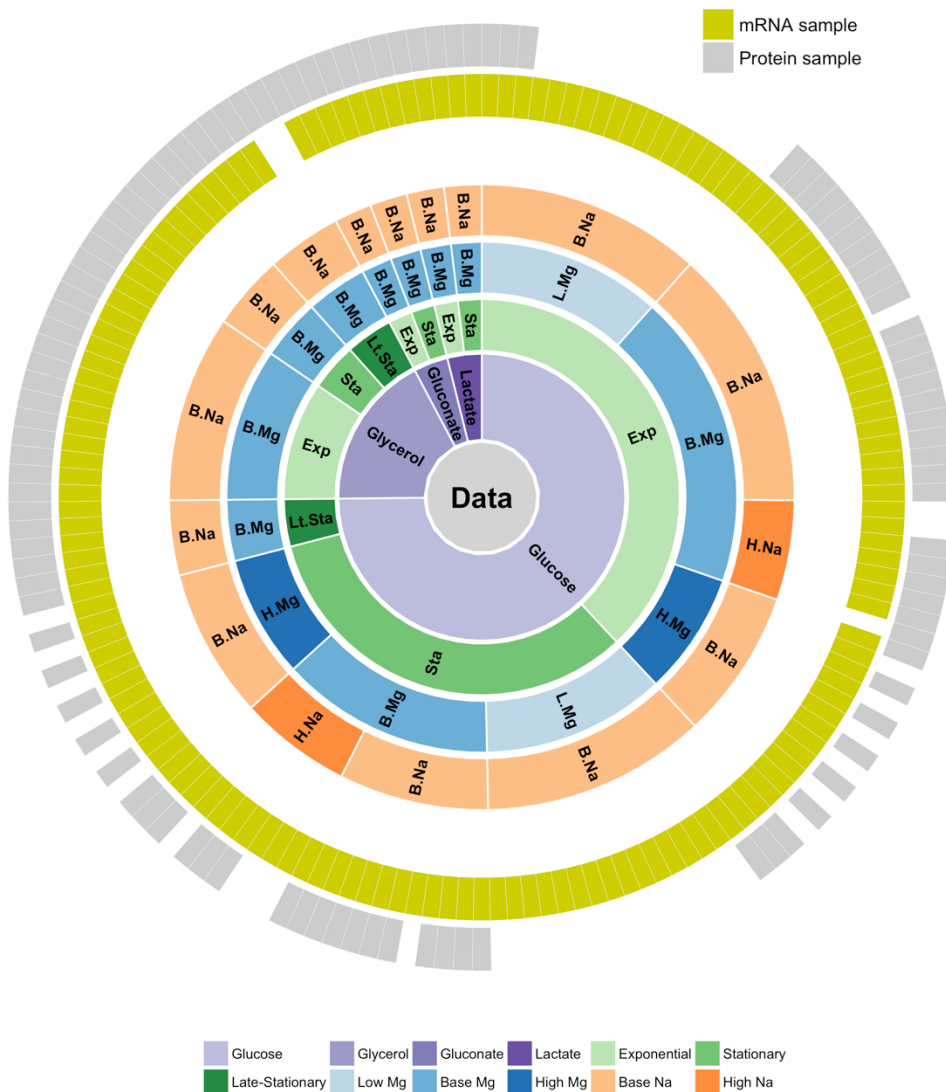

**Figure 1: Overview of available gene expression data.** Our study uses a previously published dataset consisting of 155 samples [13, 14]. 152 samples have whole-transcriptome RNA-Seq reads and 105 have mass-spec proteomics reads. 102 of the 155 samples have both mRNA and protein reads. Bacteria were grown on four different carbon sources (glucose, glycerol, gluconate, and lactate), two sodium concentrations (base and high), and three magnesium concentrations (low, base, and high). Samples were taken at multiple time points during a two-week interval, and they can be broadly subdivided into exponential phase, stationary phase, and late stationary phase samples.

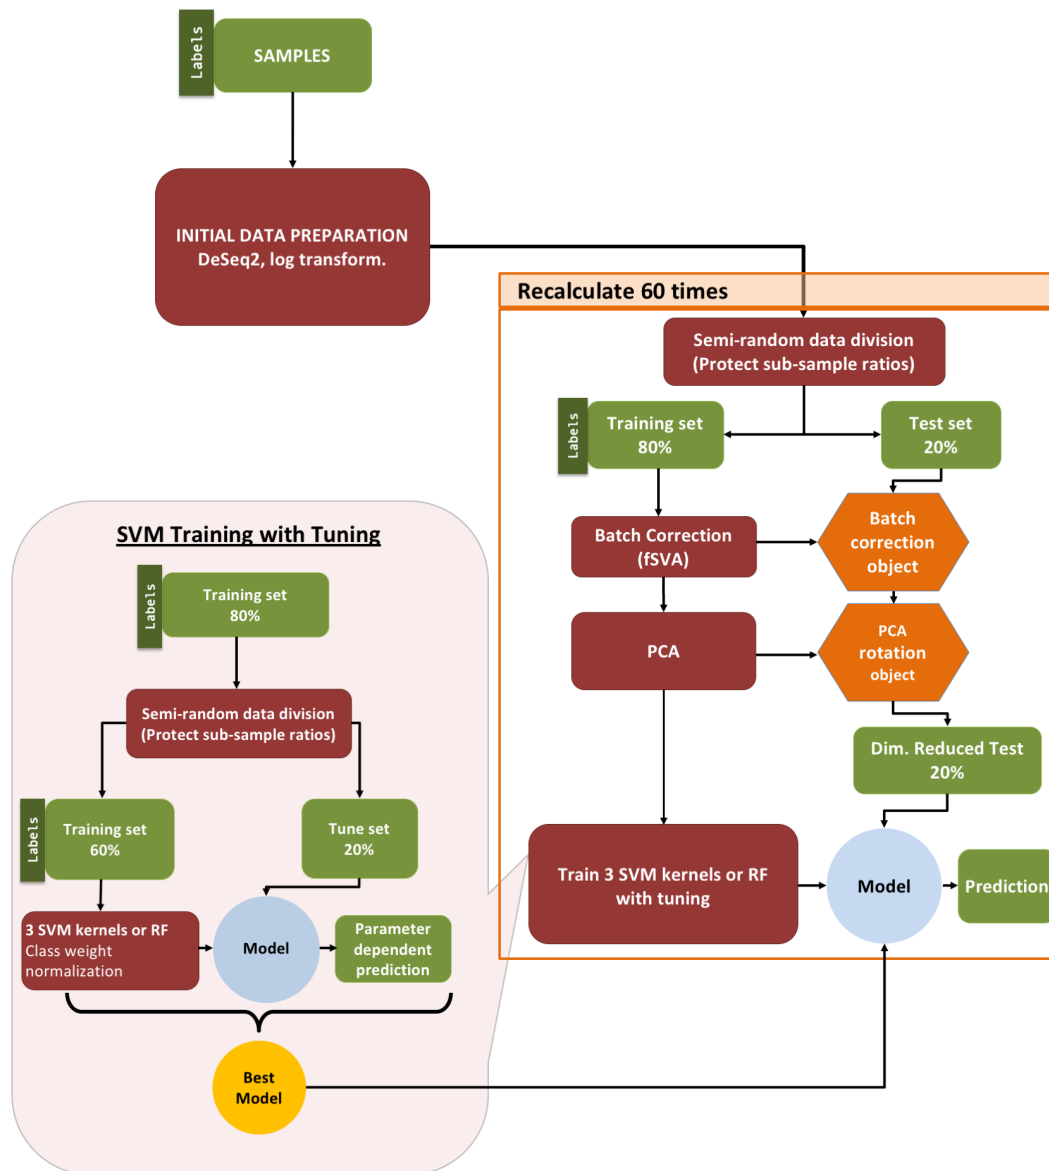

631

632 **Figure 2: Machine learning pipeline.** Our pipeline can be separated into three parts:

633 (i) initial data preparation, (ii) training and prediction, and (iii) model tuning. After (i)

634 initial data preparation, the samples are (ii) semi-randomly (preserving sub-sample

635 ratios) separated into 2 parts, the training & tune set and the test set. After applying

636 fSVA and PCA to the training data, we train supervised SVM or random forest models

637 via tuning. After obtaining the tuned model we make predictions on the test data that

638 has been batch corrected (via fSVA) and rotated (via PCA). This whole process is

639 repeated 60 times to collect statistics on model performance. For model tuning (iii), the

640 training & tune data set is similarly divided semi-randomly into training and tune

641 datasets. The tuning procedure is repeated 10 times and the model that performs best

642 on average during the 10 repeats is considered the winning model and is used for

643 prediction on the test data.

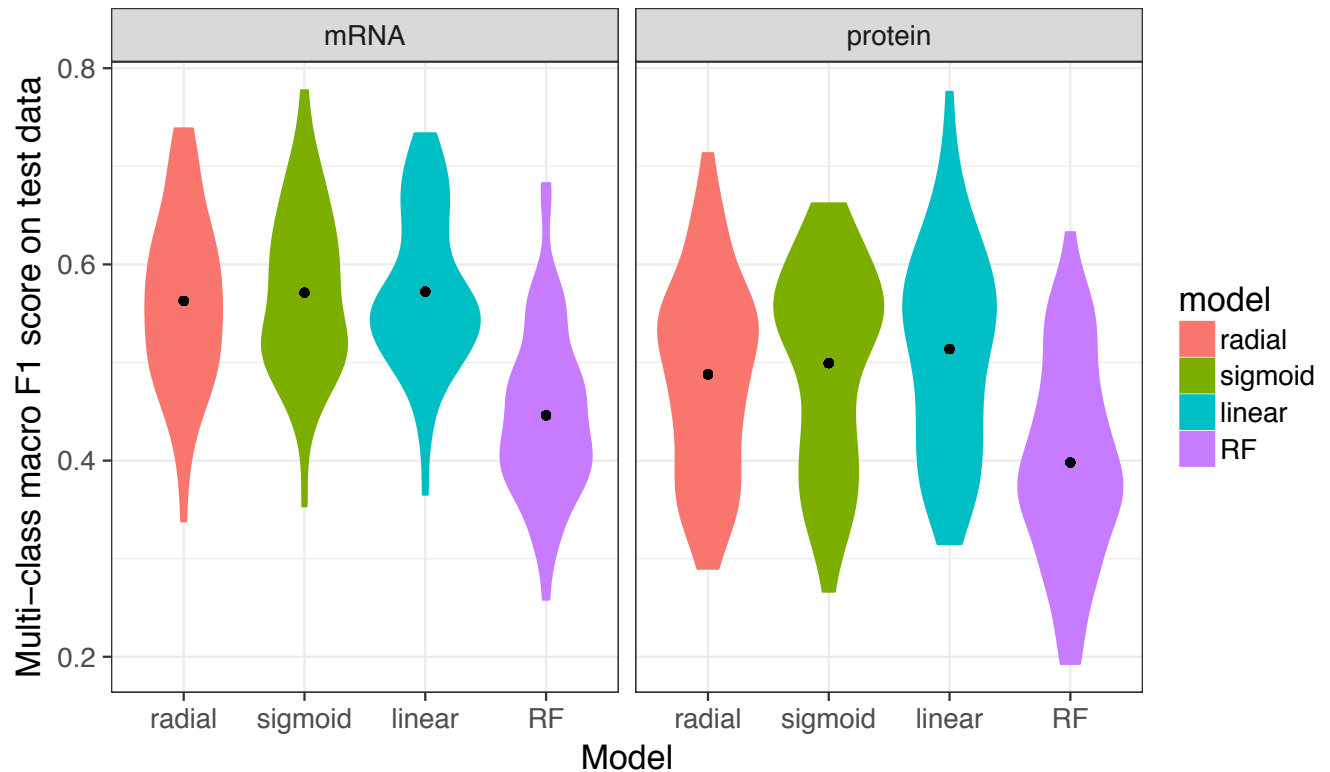

644  
645

646 **Figure 3: Performance of multi-class predictions.** Distributions of multi-class macro  
647  $F_1$  score for prediction of growth conditions from mRNA or protein abundances, using  
648 four different machine-learning algorithms (SVM with radial, sigmoidal, or linear  
649 kernel, and random forest [RF] models). For each model type, 60 independent models were  
650 trained on 60 independent subdivisions of the data into training and test sets. We found  
651 that random forest models consistently performed worse than SVM models, and  
652 predictions based on mRNA data were slightly better than predictions based on protein  
653 data. The black dots represent the mean  $F_1$  scores.



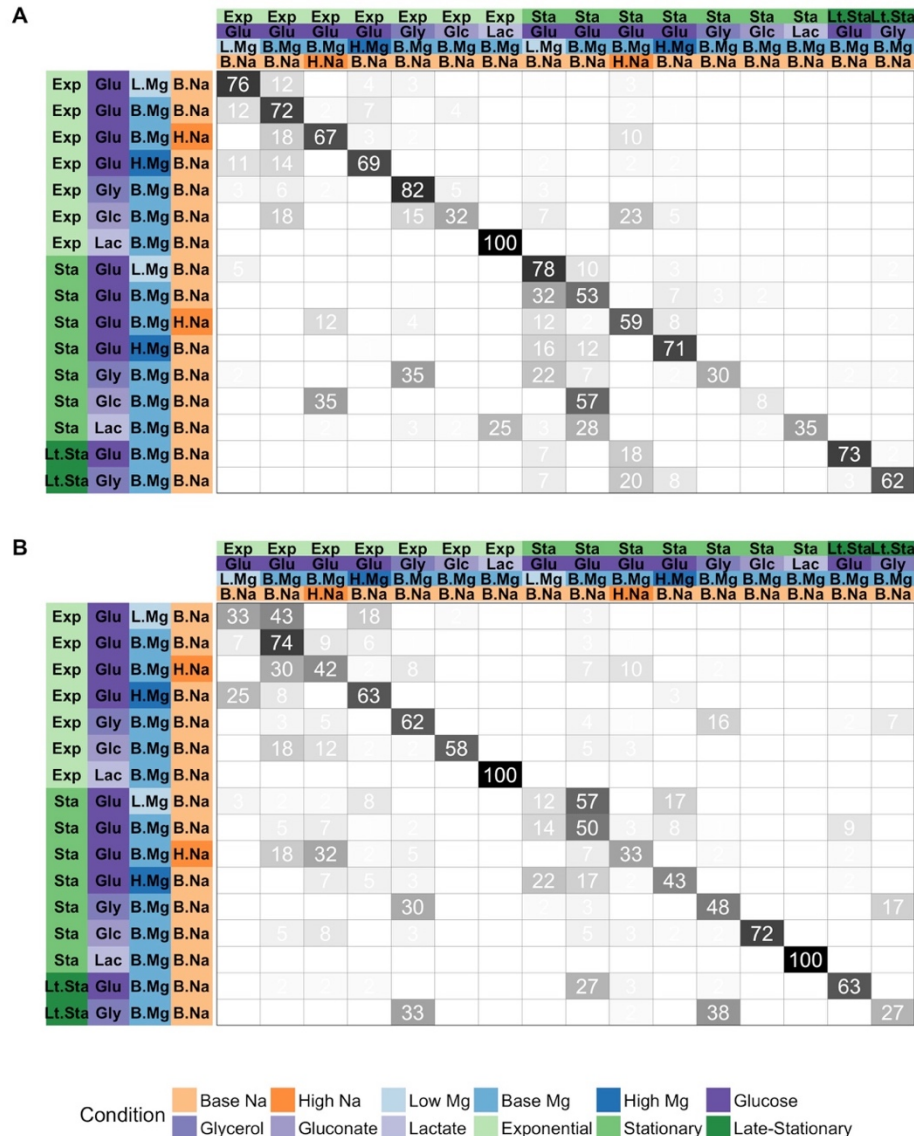

654

655

656

657

658

659

660

661

662

663

664

665

666

**Figure 4. Prediction accuracy for specific growth conditions.** In each matrix, rows represent true conditions and columns represent predicted conditions. The numbers in the cells and the shading of the cells represent the percentage (out of 60 independent replicates) with which a given true condition is predicted as a certain predicted condition. (A) Predictions based on mRNA abundances. Results are shown for the SVM with radial kernel, which was the best performing model in the tuning process on mRNA data, where it won 55 of 60 independent runs. In this sub-figure, the average of the diagonal line is 60.5% and corresponding multi-class macro  $F_1$  score is 0.61. (B) Predictions based on protein abundances. Results are shown for the SVM with sigmoidal kernel, which was the best performing model in the tuning process on protein data, where it won 41 of 60 independent runs. In this sub-figure, the average of the diagonal line is 55.1% and corresponding multi-class macro  $F_1$  score is 0.56.

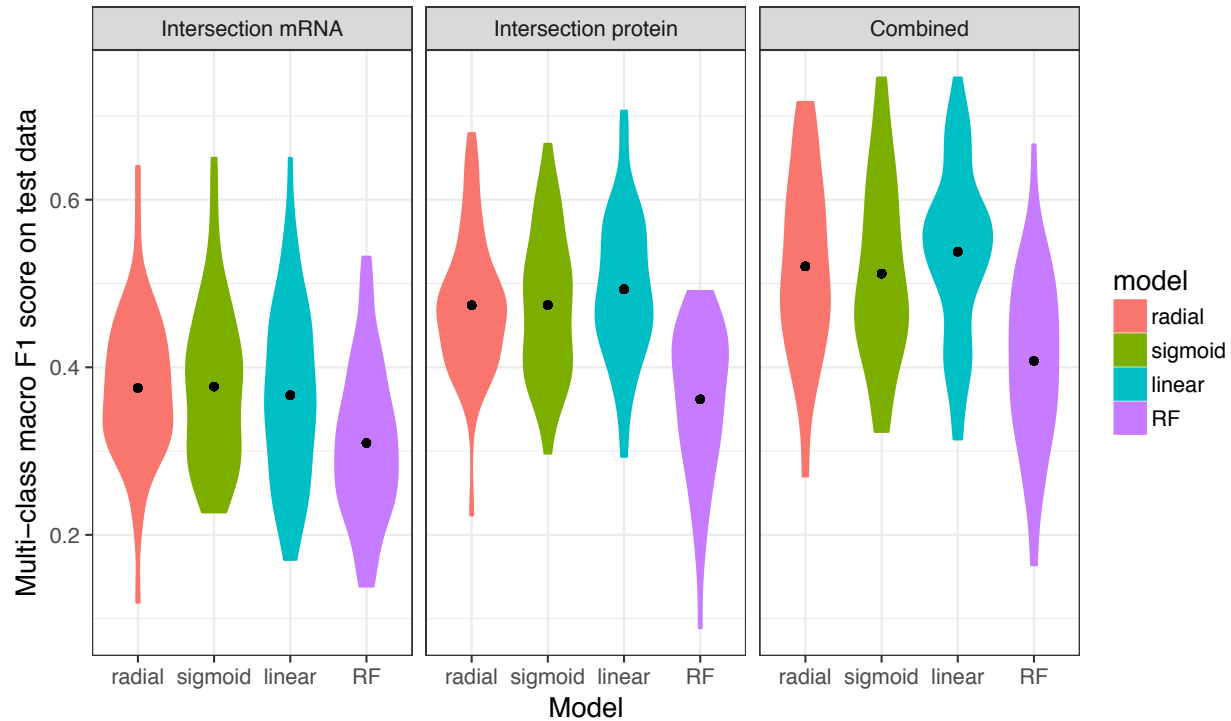

667  
668  
669  
670  
671  
672  
673  
674  
675  
676

**Figure 5. Models trained on both mRNA and protein data perform better than models trained on only one data type.** The 102 samples for which we have both protein and mRNA abundances were used to compare the performance of machine learning models based on only mRNA, only protein, and mRNA and protein data combined (left to right, respectively). Regardless of the machine learning model used, prediction performance was higher for models that use protein data compared to mRNA data. Further, using both mRNA or protein data resulted in higher predictive power compared to either alone. Statistical significance of these differences is reported in Table 2.

677

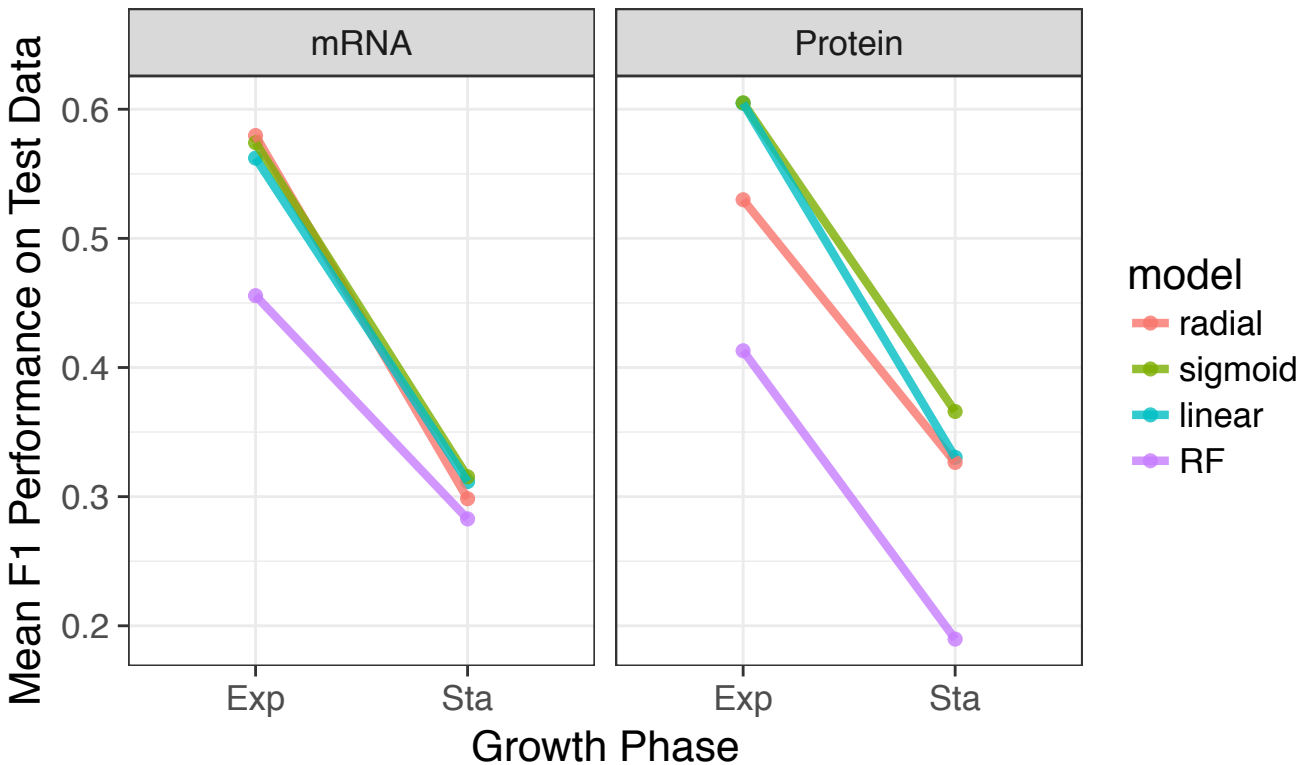

678

679

680 **Figure 6. Prediction accuracy systematically declines from exponential to**  
681 **stationary.** We separated data by growth phase and then trained models to predict

682 carbon source, magnesium level, and sodium level within each growth phase.

683 Regardless of machine-learning model data source (mRNA or protein), prediction

684 accuracy was substantially lower for stationary-phase samples than for exponential-

685 phase samples. For each model and growth phase, dots show the mean  $F_1$  score over

60 replicates and lines connect mean  $F_1$  scores calculated for the same model.

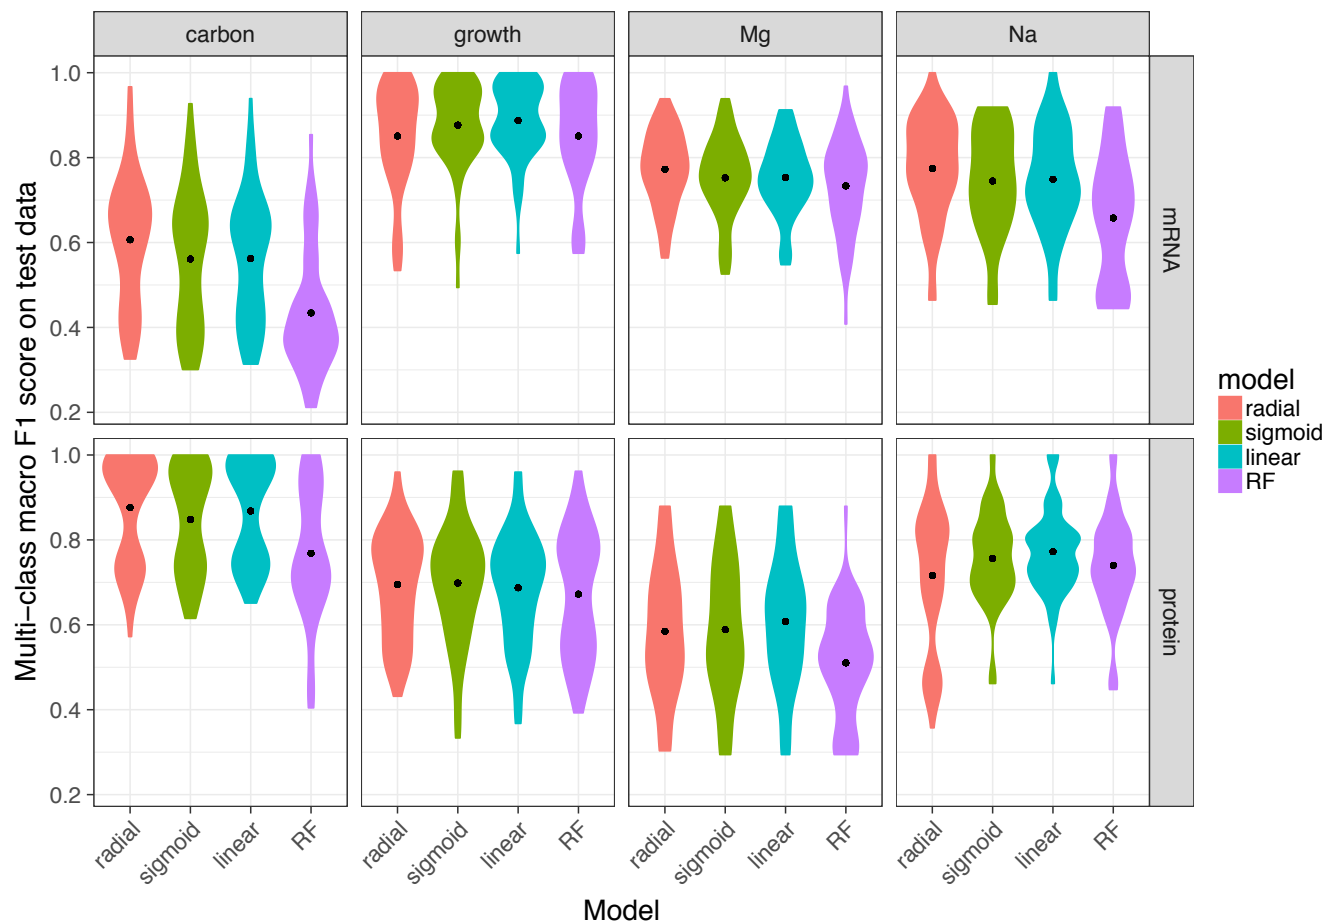

686  
687 **Figure 7. Model performance on univariate predictions.** The multi-class macro  $F_1$   
688 score of tuned models over test data for four individual conditions: carbon source,  
689 growth phase,  $Mg^{2+}$  levels, and  $Na^+$  levels. To keep mRNA-based and protein-based  
690 predictions comparable, we used the 102 samples with both mRNA and protein  
691 abundances for this analysis. Note that we used the multi-class macro  $F_1$  score even for  
692 univariate predictions, by averaging the component  $F_1$  scores for the individual  
693 outcomes, such as the different carbon sources.  
694

**A**

| Sample                    | Na level | Mg level | Carbon source | Growth phase |
|---------------------------|----------|----------|---------------|--------------|
| A (Base)                  | base     | high     | Glucose       | Exponential  |
| B (Glycerol)              | base     | high     | Glucose       | Exponential  |
| C (High Na)               | base     | high     | Glucose       | Exponential  |
| D (Stationary phase)      | base     | base     | Glucose       | Stationary   |
| E (Late stationary phase) | base     | base     | Glucose       | Stationary   |

**B**

| Sample                    | Na level | Mg level | Carbon source | Growth phase |
|---------------------------|----------|----------|---------------|--------------|
| A (Base)                  | base     | base     | Gluconate     | Exponential  |
| B (Glycerol)              | base     | base     | Gluconate     | Exponential  |
| C (High Na)               | high     | base     | Glucose       | Exponential  |
| D (Stationary phase)      | base     | base     | Glucose       | Stationary   |
| E (Late stationary phase) | base     | base     | Glucose       | Stationary   |

695

696 **Figure 8. Performance of the protein model on external data.** For each of the five  
697 external samples we matched to conditions in our dataset, we show the predicted  
698 sodium level, magnesium level, carbon source, and growth phase. Black text indicates a  
699 correct prediction. Red text indicates an incorrect prediction. Blue text indicates a  
700 prediction for a condition where the external data falls between two categories in our  
701 data (see Methods for details). (A) Predictions using a model trained on our complete  
702 dataset. Any missing protein abundances in the external test data were replaced by the  
703 median values from the training dataset. (B) Predictions using a model that was trained  
704 on our complete dataset using only the subset of proteins that were present in the  
705 external test data.

706

707 **Tables**

708

709 **Table 1: Winning-model distributions at the tuning stage.** Numbers show the  
 710 number of times out of 60 independent runs that each given model had the highest  $F_1$   
 711 score in the tuning process. Results are shown separately for predictions on the mRNA  
 712 and the protein data. The ties are counted for all the winner models as a result the sums  
 713 are bigger than 60

714

| Model                        | mRNA | Protein |
|------------------------------|------|---------|
| <b>SVM, radial kernel</b>    | 53   | 8       |
| <b>SVM, sigmoidal kernel</b> | 6    | 41      |
| <b>SVM, linear kernel</b>    | 0    | 3       |
| <b>Random Forest</b>         | 1    | 13      |

715

716

717

718 **Table 2: Statistical significance of comparisons shown in Figure 5.** Distributions of  
 719 multi-class macro  $F_1$  scores were compared using t-tests. The adjusted  $P$  value reports  
 720 the false discovery rate (FDR). All comparisons are statistically significant after  
 721 correction for multiple testing via FDR.

722

| Model                        | Comparison                | $P$ value | Adjusted $P$ value |
|------------------------------|---------------------------|-----------|--------------------|
| <b>SVM, radial kernel</b>    | mRNA vs protein           | 1.943E-09 | 4.663E-09          |
| <b>SVM, radial kernel</b>    | mRNA + protein vs mRNA    | 3.908E-13 | 2.345E-12          |
| <b>SVM, radial kernel</b>    | mRNA + protein vs protein | 8.425E-03 | 1.087E-02          |
|                              |                           | 3.327E-08 | 6.654E-08          |
| <b>SVM, sigmoidal kernel</b> | mRNA vs protein           |           |                    |
| <b>SVM, sigmoidal kernel</b> | mRNA + protein vs mRNA    | 3.088E-11 | 1.235E-10          |
| <b>SVM, sigmoidal kernel</b> | mRNA + protein vs protein | 3.517E-02 | 3.517E-02          |
|                              |                           | 4.728E-11 | 1.418E-10          |
| <b>SVM, linear kernel</b>    | mRNA vs protein           |           |                    |
| <b>SVM, linear kernel</b>    | mRNA + protein vs mRNA    | 1.595E-15 | 1.914E-14          |
| <b>SVM, linear kernel</b>    | mRNA + protein vs protein | 9.441E-03 | 1.087E-02          |
|                              |                           | 1.818E-03 | 2.727E-03          |
| <b>Random forest</b>         | mRNA vs protein           |           |                    |
| <b>Random forest</b>         | mRNA + protein vs mRNA    | 1.928E-07 | 3.306E-07          |
| <b>Random forest</b>         | mRNA + protein vs protein | 9.968E-03 | 1.087E-02          |

723

724

## 725 Supporting information

726 **S1 Fig.** Tuning results for predictions based on mRNA data, generated from one of 60  
727 independent runs and chosen for demonstration purposes. Model performance is  
728 measured as the mean  $F_1$  score over 10 independent tuning runs. Higher numbers  
729 indicate better performance. (A) Tuning results for SVMs with linear kernel. Only the  
730 cost parameter was tuned. (B) Tuning results for SVMs with radial kernel. The cost and  
731 gamma parameters were tuned. The red dot indicates the winning parameter  
732 combination. (C) Tuning results for SVMs with sigmoidal kernel. The cost and gamma  
733 parameters were tuned. The red dot indicates the winning parameter combination. (D)  
734 Tuning results for random forest models. The mtry, nodesize, and ntrees parameters  
735 were tuned. We used three values for ntrees, 1000, 5000, and 10000, shown as three  
736 separate panels. The red dot indicates the winning parameter combination.

737  
738 **S2 Fig.** Tuning results for predictions based on protein data, generated from one of 60  
739 independent runs and chosen for demonstration purposes. (A) Tuning results for SVMs  
740 with linear kernel. Only the cost parameter was tuned. (B) Tuning results for SVMs with  
741 radial kernel. The cost and gamma parameters were tuned. The red dots indicate the  
742 winning parameter combinations. (C) Tuning results for SVMs with sigmoidal kernel.  
743 The cost and gamma parameters were tuned. The red dot indicates the winning  
744 parameter combination. (D) Tuning results for random forest models. The mtry,  
745 nodesize, and ntrees parameters were tuned. We used three values for ntrees, 1000,  
746 5000, and 10000, shown as three separate panels. The red dot indicates the winning  
747 parameter combination.

748  
749 **S3 Fig.** Percentage of correct predictions as a function of the number of samples during  
750 training. (A) Predictions based on mRNA abundances. (B) Predictions based on protein  
751 abundances.

752  
753 **S4 Fig.** The error count distribution for mRNA (A) and protein (B) confusion matrices.  
754 The number of mis-predicted labels (x-axis) indicates how many of the 4 possible  
755 condition variables that an individual prediction got wrong. 0 mis-predicted labels (the  
756 majority in both cases) means that model predictions were 100% accurate. In both  
757 cases (mRNA and protein), when an incorrect prediction was made, it was most  
758 frequently due to a single variable being incorrectly predicted (number of mis-predicted  
759 labels with a value of 1) as compared to errors predicting more than one variable for a  
760 given condition (2 and 3 mis-predicted labels).

761  
762 **S5 Fig.** Prediction accuracy for specific growth conditions for intersection mRNA data.  
763 Rows represent true conditions and columns represent predicted conditions. The  
764 numbers in the cells and the shading of the cells represent the percentage (out of 60  
765 independent replicates) with which a given true condition is predicted as a certain  
766 predicted condition. Predictions based on mRNA abundances, generated by using  
767 subset of mRNA samples which has matching protein pairs. Results are shown for the

768 SVM with radial kernel, which was the best performing model in the tuning process on  
769 mRNA data, where it won 48 of 60 independent runs. In this figure average of the  
770 diagonal line is 44.1% and multi class macro F1 score is 0.43.

771  
772 **S6 Fig.** Prediction accuracy for specific growth conditions for intersection protein data.  
773 Rows represent true conditions and columns represent predicted conditions. The  
774 numbers in the cells and the shading of the cells represent the percentage (out of 60  
775 independent replicates) with which a given true condition is predicted as a certain  
776 predicted condition. Predictions based on protein abundances, generated by using  
777 subset of protein samples which has matching mRNA pairs. Results are shown for the  
778 SVM with sigmoid kernel, which was the best performing model in the tuning process on  
779 mRNA data, where it won 47 of 60 independent runs. In this figure average of the  
780 diagonal line is 52.3% and corresponding multi class macro F1 score is 0.53.

781  
782 **S7 Fig.** Prediction accuracy for specific growth conditions for intersection mRNA &  
783 protein data. Rows represent true conditions and columns represent predicted  
784 conditions. The numbers in the cells and the shading of the cells represent the  
785 percentage (out of 60 independent replicates) with which a given true condition is  
786 predicted as a certain predicted condition. Predictions based on protein abundances,  
787 generated by using subset of mRNA & protein samples which has matching pairs.  
788 Results are shown for the SVM with sigmoid kernel, which was the best performing  
789 model in the tuning process on combined intersection data, where it won 27 of 60  
790 independent runs. In this figure average of the diagonal line is 56.1% and corresponding  
791 multi class macro F1 score is 0.57.

792  
793 **S8 Fig.** Prediction accuracy for univariate predictions using intersection mRNA and  
794 intersection protein data, as in the main text Figure 7. (A) Prediction of carbon source  
795 from mRNA abundances. (B) Prediction of carbon source from protein abundances. (C)  
796 Prediction of growth phase from mRNA abundances. (D) Prediction of growth phase  
797 from protein abundances. (E) Prediction of Mg<sup>2+</sup> levels from mRNA abundances. (F)  
798 Prediction of Mg<sup>2+</sup> levels from protein abundances. (G) Prediction of Na<sup>+</sup> levels from  
799 mRNA abundances. (H) Prediction of Na<sup>+</sup> levels from protein abundances.

800  
801 **S9 Fig.** Prediction accuracy for univariate predictions based on intersection mRNA  
802 abundances, intersection protein abundances, or the combined dataset including both  
803 mRNA and protein abundances. Protein abundances are more predictive for carbon  
804 source and Mg<sup>2+</sup> levels, and mRNA abundances are more predictive for Na<sup>+</sup> levels and  
805 growth phase.

806
